# Supplementary material for: IL-17C is a driver of damaging inflammation during Neisseria gonorrhoeae infection of human Fallopian tube
Source: PubMed Central journal article supplement (PMC11069574; doi:10.1038/s41467-024-48141-3), 2024-05-04
Supplement: 41467_2024_48141_MOESM3_ESM.pdf [file 41467_2024_48141_MOESM3_ESM.pdf]

## Description of Additional Supplementary Files

File Name: Data S1

Description: Pathway analysis of WT vs  $\Delta/dcA$  mutant treated tissues at 24h. Gene ontology (GO) biological function pathway analysis.
